# Supplementary material for: Modulation of the mechanism of action of antibacterial silver N-heterocyclic carbene complexes by variation of the halide ligand
Source: Royal Society of Chemistry journal article supplement (doi:10.1039/d4ra08093a), 2025-01-01
Supplement: d4ra08093a1.pdf [file d4ra08093a1.pdf]

## Supporting Information

### **Modulation of the mechanism of action of antibacterial silver N-heterocyclic carbene complexes by variation of the halide ligand**

Igor V. Esarev, Ingo Ott

Institute of Medicinal and Pharmaceutical Chemistry, Technische Universität Braunschweig,  
Beethovenstr. 55, 38106 Braunschweig, Germany

#### **Table of contents**

**Figure S1.** The hydrolysis of ONPG in *E.coli* cell lysate (S2)

**Table S1** The optimized temperature program for HRCS-AAS quantification of silver amount in *E.coli* cells (S2)

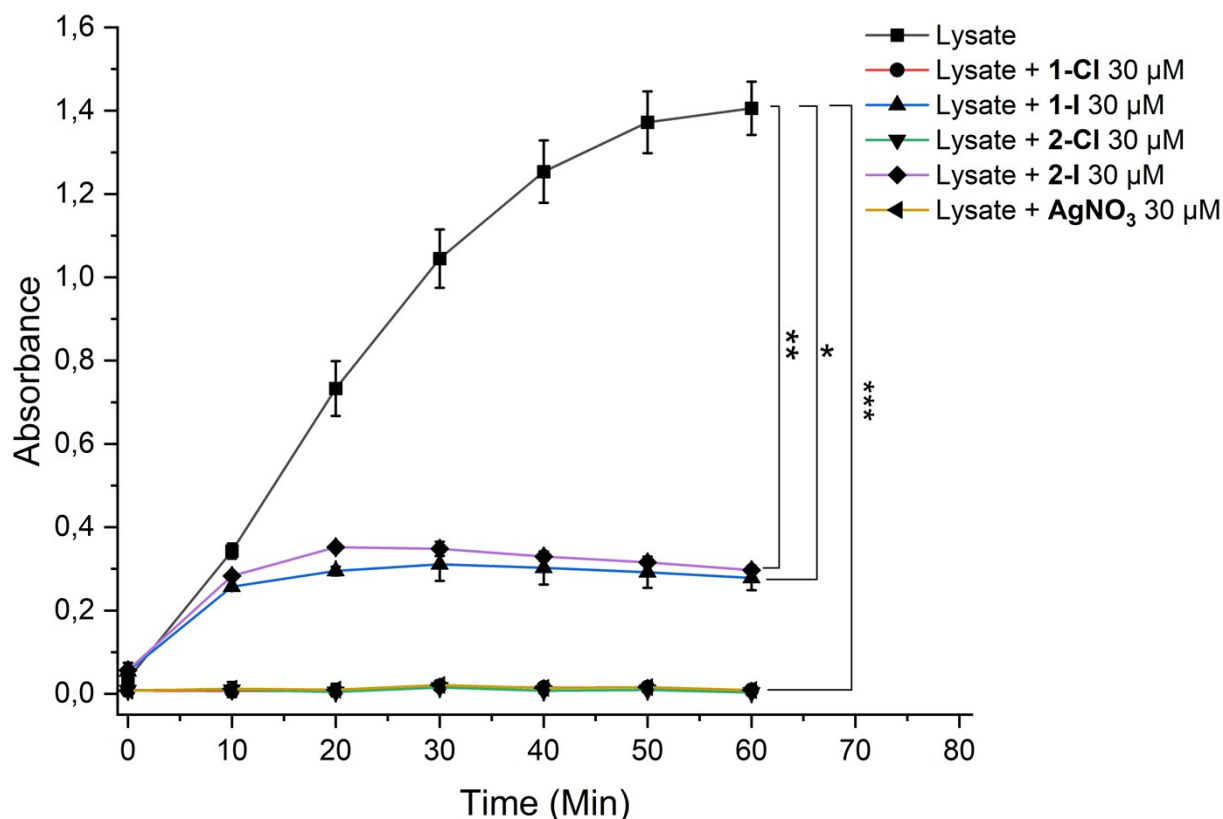

**Figure S1.** The hydrolysis of ONPG in *E.coli* cell lysate. 200  $\mu$ l of lysate containing ONPG was mixed with 2  $\mu$ l of DMSO (Lysate) or 2  $\mu$ l of 3 mM solutions of chloride (**3a**, **4a**), iodide (**3c**, **4c**) silver NHC complexes or silver nitrate ( $\text{AgNO}_3$ ) in DMSO ( $n = 3$ ). Each sample is compared with cell lysate without treatment by 95% Tukey's HSD test (\* =  $p < 0.05$ , \*\* =  $p < 0.01$ , \*\*\* =  $p < 0.001$ )

**Table S1.** The optimized temperature program for HRCS-AAS quantification of silver amount in *E.coli* cells

| Step           | Temperature, $^{\circ}\text{C}$ | Heating rate, $^{\circ}\text{C s}^{-1}$ | Hold time, s |
|----------------|---------------------------------|-----------------------------------------|--------------|
| Drying         | 80                              | 6                                       | 20           |
| Drying 2       | 110                             | 5                                       | 10           |
| Pyrolysis      | 350                             | 50                                      | 10           |
| Pyrolysis 2    | 700                             | 300                                     | 10           |
| Gas adjustment | 700                             | 0                                       | 3            |
| Atomization    | 1600                            | 1500                                    | 3            |
| Cleaning       | 2450                            | 500                                     | 4            |
